# Supplementary material for: Contribution of Leisure Context, Motivation and Experience to the Frequency of Participation in Structured Leisure Activities among Adolescents
Source: MDPI journal article supplement (doi:10.3390/ijerph19020877), 2022-01-13
Supplement: s1 [file s1]

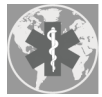

**Table S1.** Correlation coefficients between study variables.

|                                            | 1 | 2    | 3     | 4     | 5          | 6          | 7          | 8          | 9          | 10         | 11         | 12         | 13         | 14         | 15         | 16         | 17         | 18     | 19         | 20         | 21     |
|--------------------------------------------|---|------|-------|-------|------------|------------|------------|------------|------------|------------|------------|------------|------------|------------|------------|------------|------------|--------|------------|------------|--------|
| 1. Gender                                  | - | 0.05 | 0.11* | 0.09* | -0.02      | -<br>0.15* | -<br>0.15* | 0.05       | 0.06*      | 0.06*      | 0.01       | -0.00      | 0.06*      | 0.06*      | -0.02      | -<br>0.13* | -<br>0.17* | -0.17* | -<br>0.11* | -<br>0.17* | -0.22* |
| 2. Safety                                  |   | -    | 0.72* | 0.64* | -<br>0.27* | -0.01      | 0.23*      | 0.46*      | 0.42*      | 0.53*      | 0.55*      | 0.51*      | 0.52*      | 0.46*      | 0.42*      | -0.01      | -<br>0.09* | -0.05  | -<br>0.06* | -0.03      | 0.27*  |
| 3. Opportunities                           |   |      | -     | 0.87* | -<br>0.29* | -0.03      | 0.18       | 0.44*      | 0.45*      | 0.46*      | 0.50*      | 0.43*      | 0.53*      | 0.42*      | 0.36*      | -<br>0.09* | -<br>0.19* | -0.16* | -<br>0.13* | -<br>0.12* | 0.20*  |
| 4. Relationships                           |   |      |       | -     | -<br>0.31* | -<br>0.08* | 0.12*      | 0.43*      | 0.46*      | 0.39*      | 0.45*      | 0.38*      | 0.46*      | 0.36*      | 0.27*      | -<br>0.15* | -<br>0.25* | -0.22* | -<br>0.21* | -<br>0.20* | 0.18*  |
| 5. Amotivation                             |   |      |       |       | -          | 0.39*      | 0.05*      | -<br>0.23* | -<br>0.39* | -<br>0.22* | -<br>0.27* | -<br>0.22* | -<br>0.19* | -<br>0.14* | -<br>0.07* | 0.20*      | 0.27*      | 0.24*  | 0.25*      | 0.25*      | -0.24* |
| 6. External motivation                     |   |      |       |       |            | -          | 0.39*      | 0.16*      | -<br>0.07* | 0.10*      | 0.02*      | 0.02*      | 0.01*      | 0.06*      | 0.11*      | 0.22*      | 0.22*      | 0.23** | 0.20*      | 0.24*      | 0.09*  |
| 7. Introjected motivation                  |   |      |       |       |            |            | -          | 0.48*      | 0.30*      | 0.34*      | 0.33*      | 0.29*      | 0.21*      | 0.24*      | 0.24*      | 0.16*      | 0.06*      | 0.14*  | 0.10*      | 0.14*      | 0.22*  |
| 8. Identified motivation                   |   |      |       |       |            |            |            | -          | 0.65*      | 0.50*      | 0.50*      | 0.42*      | 0.32*      | 0.32*      | 0.25*      | -<br>0.10* | -<br>0.19* | -0.16* | -<br>0.18* | -<br>0.15* | 0.24*  |
| 9. Intrinsic motivation                    |   |      |       |       |            |            |            |            | -          | 0.36*      | 0.44*      | 0.38*      | 0.33*      | 0.27*      | 0.14*      | -<br>0.22* | -<br>0.31* | -0.27* | -<br>0.25* | -<br>0.25* | 0.25*  |
| 10. Identity experiences                   |   |      |       |       |            |            |            |            |            | -          | 0.75*      | 0.68*      | 0.54*      | 0.61*      | 0.54*      | 0.13*      | 0.00       | 0.07*  | 0.05       | 0.07*      | 0.31*  |
| 11. Initiative experiences                 |   |      |       |       |            |            |            |            |            |            | -          | 0.77*      | 0.63*      | 0.68*      | 0.55*      | 0.09*      | -0.03      | 0.03   | 0.02       | 0.04       | 0.34*  |
| 12. Emotion regulation experiences         |   |      |       |       |            |            |            |            |            |            |            | -          | 0.60*      | 0.65*      | 0.52*      | 0.09*      | -0.01      | 0.04   | 0.03       | 0.04       | 0.29*  |
| 13. Teamwork and social skills experiences |   |      |       |       |            |            |            |            |            |            |            |            | -          | 0.75*      | 0.68*      | 0.20*      | 0.07*      | 0.13*  | 0.12*      | 0.14*      | 0.23*  |
| 14. Positive relationship experiences      |   |      |       |       |            |            |            |            |            |            |            |            |            | -          | 0.68*      | 0.26*      | 0.15*      | 0.23*  | 0.20*      | 0.22*      | 0.22*  |

|                                                   |   |       |       |       |       |       |       |
|---------------------------------------------------|---|-------|-------|-------|-------|-------|-------|
| 15. Adult networks and social capital experiences | - | 0.44* | 0.30* | 0.39* | 0.34* | 0.36* | 0.20* |
| 16. Stress                                        | - | 0.68* | 0.77* | 0.72* | 0.74* | 0.07* |       |
| 17. Inappropriate adult behavior                  |   | -     | 0.80* | 0.75  | 0.84* | -0.01 |       |
| 18. Negative peer influences                      |   |       |       | -     | 0.82* | 0.83* | 0.01  |
| 19. Social exclusion                              |   |       |       |       | -     | 0.82* | 0.03  |
| 20. Negative group dynamics                       |   |       |       |       |       | -     | 0.04  |
| 21. Frequency of adolescents' participation       |   |       |       |       |       |       | -     |

Note: \* $p < 0.05$ .
